# Supplementary material
Source: bioRxiv or medRxiv preprint supplement (https://medrxiv.org/highwire/filestream/88815/field_highwire_adjunct_files/0/2020.07.05.20146977-1.pdf)
Supplement: Supplementary file [file 2020.07.05.20146977-1.pdf]

# Supplementary Material for “An Agent Based Modeling of COVID-19: Validation, Analysis, and Recommendations”

Md. Salman Shamil, Farhanaz Farheen, Nabil Ibtehaz, Irtesam Mahmud Khan, M. Sohel Rahman

*Department of CSE, BUET, ECE Building, West Palasi, Dhaka-1205*

## 1. Details of the Agent Based Model

The set of states in our model is given by  $S = \{H, N, A, S, D\}$  and any agent at any period of time will be in one of these five states. When an agent reaches state S, (s)he may or may not be hospitalized which, in our model, has been determined by assigning a probability to it. Once hospitalized, all activities previously performed by the patient are halted and the infected person stays at the hospital throughout the day.

The set of groups in our model is given by  $G = \{F, T, W, E, H\}$  where the elements in the set represent the following -

F = Stay home

T = Commute

W = Work or attend school

E = Attend event

H = Stay at the hospital

Each agent at any period of time belongs to one of these five groups for an hour before being allocated to a new group based on supplementary Table 3 and Table 9.

For transportation, at first, our model calculates the total number of free seats by multiplying the number of transports with the passenger capacity. Then it assigns a free seat to a new agent. Every time an agent is given a free seat, the seat becomes occupied and the number of free seats in that transport is decremented.

## 2. Digital Herd Immunity

When most of the people in a population become immune to an infectious disease (via vaccines or mass infection), the spread of the disease can be controlled. This condition is called herd immunity.<sup>1</sup> This means that although people might come in contact with infected patients, they won't fall sick i.e. it will be defeated by their immune system. However, even without making the population biologically immune to an infectious disease, the population can be made immune to epidemic growth with the use of technology.<sup>2</sup> This condition is known as digital herd immunity. The concept of contact tracing is important to comprehend digital herd immunity. In order to contain the spread of infectious diseases like COVID-19 where no vaccines have been produced yet, Non-Pharmaceutical Interventions (NPI) such as lock-down, awareness and preventive measures are undertaken. Contact tracing is the act of identifying the people who came within close proximity of an infected person and subsequently quarantining them before they can infect others. Many diseases like COVID-19 have an omega period - which is the portion of the incubation period where the disease becomes contagious i.e. the period of asymptomatic transmission. Since new infections are only found due to onset of symptoms, it is likely that some people who came into contact with the infected person during the omega period have been infected as well. Contacts can be traced by manually interviewing the potential contacts of the patient but this is quite impracticable. Digital contact tracing uses

technology i.e. smartphones to store information on people in close proximity of infected patients. Bluetooth or GPS are two competing ways to trace contacts.<sup>3</sup> By digital contact tracing and quarantining potentially infected people even before they show any symptoms during their latent period (the asymptomatic and not contagious stage), the spread of the disease can be significantly lowered, eventually leading to elimination of any further epidemic growth and, therefore, digital herd immunity. Our extensive experiments on different percentages of people being smartphone owners give a general idea about the time and total number of infections to reach digital herd immunity by contact tracing.

### 3. Supplementary Tables for Ford County, Kansas, USA:

| Name                     | Value |
|--------------------------|-------|
| min_age                  | 1     |
| max_age                  | 77    |
| min_name_length          | 3     |
| max_name_length          | 7     |
| min_family_size          | 1     |
| max_family_size          | 5     |
| n_workgroup              | 4000  |
| n_transport              | 1000  |
| transport_seat_limit     | 40    |
| n_events                 | 335   |
| n_persons                | 33619 |
| n_infected_init          | 2     |
| awareness_start          | 1     |
| quarantine_start         | 1     |
| quarantined_person_ratio | 0.4   |

Table 1: Part 1 of location-specific data for Ford county including total population, initial cases, average family size, life expectancy, lock-down declaration etc.

| Name    | Minimum age | Maximum age | Percentage | Total number |
|---------|-------------|-------------|------------|--------------|
| Student | 4           | 25          | 0.32       | 10758        |

|            |    |    |       |       |
|------------|----|----|-------|-------|
| Service    | 18 | 65 | 0.488 | 16406 |
| Doctor     | 30 | 65 | 0.005 | 168   |
| Unemployed | 10 | 77 | 0.187 | 6286  |

Table 2: Part 2 of location-specific data for Ford county including percentage of the total population belonging to different professions.

| Task           | Minimum start time | Maximum start time | Minimum duration | Maximum duration | Profession   | Minimum probability | Maximum probability |
|----------------|--------------------|--------------------|------------------|------------------|--------------|---------------------|---------------------|
| Stay Home      | 0                  | 0                  | 7                | 8                | Service      | 1                   | 1                   |
| Stay Home      | 0                  | 0                  | 6                | 7                | Driver       | 1                   | 1                   |
| Stay Home      | 0                  | 0                  | 7                | 8                | Doctor       | 1                   | 1                   |
| Go to Work     | 7                  | 8                  | 1                | 2                | Service      | 0.4                 | 1                   |
| Go to Work     | 6                  | 7                  | 1                | 1                | Driver       | 0.4                 | 1                   |
| Go to Work     | 7                  | 8                  | 1                | 2                | Doctor       | 0.8                 | 1                   |
| Work           | 8                  | 10                 | 8                | 9                | Service      | 0.4                 | 1                   |
| Treat Patients | 7                  | 8                  | 8                | 12               | Driver       | 0.4                 | 1                   |
| Treat Patients | 8                  | 9                  | 8                | 10               | Doctor       | 0.8                 | 1                   |
| Returns Home   | 16                 | 19                 | 1                | 2                | Service      | 0.4                 | 1                   |
| Returns Home   | 15                 | 20                 | 1                | 1                | Driver       | 0.4                 | 1                   |
| Returns Home   | 16                 | 19                 | 1                | 2                | Doctor       | 0.8                 | 1                   |
| Stay Home      | 17                 | 21                 | 10               | 10               | Service      | 1                   | 1                   |
| Stay Home      | 16                 | 21                 | 10               | 10               | Driver       | 1                   | 1                   |
| Stay Home      | 17                 | 21                 | 10               | 10               | Doctor       | 1                   | 1                   |
| Attend Event   | 12                 | 14                 | 2                | 4                | Service      | 0.3                 | 0.9                 |
| Attend Event   | 12                 | 14                 | 2                | 4                | Driver       | 0.3                 | 0.6                 |
| Attend Event   | 12                 | 14                 | 2                | 3                | Doctor       | 0.3                 | 0.7                 |
| Stay Home      | 0                  | 0                  | 12               | 13               | Unemployed   | 1                   | 1                   |
| Stay Hospital  | 0                  | 0                  | 24               | 24               | Hospitalized | 1                   | 1                   |
| Stay Home      | 0                  | 0                  | 7                | 8                | Student      | 1                   | 1                   |

|              |    |    |    |    |                   |      |     |
|--------------|----|----|----|----|-------------------|------|-----|
| Go to Work   | 7  | 8  | 1  | 1  | Student           | 0.4  | 1   |
| Work         | 8  | 9  | 6  | 7  | Student           | 0.4  | 1   |
| Returns Home | 14 | 16 | 1  | 1  | Student           | 0.4  | 1   |
| Stay Home    | 15 | 17 | 10 | 10 | Student           | 1    | 1   |
| Attend Event | 12 | 14 | 2  | 4  | Student           | 0.4  | 0.9 |
| Go to Work   | 12 | 13 | 1  | 1  | Unemployed        | 0.3  | 0.8 |
| Attend Event | 13 | 14 | 2  | 4  | Unemployed        | 0.35 | 0.9 |
| Returns Home | 15 | 18 | 1  | 1  | Unemployed        | 0.3  | 0.8 |
| Stay Home    | 16 | 17 | 10 | 10 | Unemployed        | 1    | 1   |
| Stay Home    | 0  | 0  | 24 | 24 | No Outing Allowed | 1    | 1   |

Table 3: The lower and upper bounds of duration, probability of occurrence, starting and ending times for different tasks performed by an agent in Ford county.

| Name                       | Value |
|----------------------------|-------|
| action_occurring_threshold | 0.6   |
| action_affecting_threshold | 0.6   |
| action_infect_threshold    | 0.7   |
| infection_threshold        | 0.65  |

Table 4: Values of different thresholds for Ford county.

| Day | Real Data (R <sub>i</sub> ) | Model Output (M <sub>i</sub> ) | Difference (R <sub>i</sub> - M <sub>i</sub> ) |
|-----|-----------------------------|--------------------------------|-----------------------------------------------|
| 1   | 2                           | 2                              | 0                                             |
| 2   | 2                           | 2                              | 0                                             |
| 3   | 3                           | 2                              | 1                                             |
| 4   | 5                           | 2                              | 3                                             |
| 5   | 13                          | 20                             | 7                                             |
| 6   | 16                          | 28                             | 12                                            |

|    |      |      |    |
|----|------|------|----|
| 7  | 18   | 37   | 19 |
| 8  | 32   | 46   | 14 |
| 9  | 51   | 46   | 5  |
| 10 | 85   | 68   | 17 |
| 11 | 107  | 88   | 19 |
| 12 | 127  | 108  | 19 |
| 13 | 181  | 134  | 47 |
| 14 | 188  | 173  | 15 |
| 15 | 209  | 211  | 2  |
| 16 | 289  | 262  | 27 |
| 17 | 350  | 316  | 34 |
| 18 | 420  | 374  | 46 |
| 19 | 459  | 426  | 33 |
| 20 | 516  | 492  | 24 |
| 21 | 544  | 539  | 5  |
| 22 | 601  | 584  | 17 |
| 23 | 675  | 627  | 48 |
| 24 | 702  | 676  | 26 |
| 25 | 770  | 729  | 41 |
| 26 | 815  | 775  | 40 |
| 27 | 832  | 829  | 3  |
| 28 | 869  | 872  | 3  |
| 29 | 880  | 916  | 36 |
| 30 | 933  | 981  | 48 |
| 31 | 1028 | 1025 | 3  |
| 32 | 1064 | 1076 | 12 |
| 33 | 1102 | 1121 | 19 |

|    |      |      |     |
|----|------|------|-----|
| 34 | 1135 | 1166 | 31  |
| 35 | 1135 | 1217 | 82  |
| 36 | 1233 | 1250 | 17  |
| 37 | 1233 | 1303 | 70  |
| 38 | 1299 | 1363 | 64  |
| 39 | 1299 | 1398 | 99  |
| 40 | 1299 | 1437 | 138 |
| 41 | 1403 | 1479 | 76  |
| 42 | 1404 | 1503 | 99  |
| 43 | 1440 | 1542 | 102 |
| 44 | 1440 | 1572 | 132 |
| 45 | 1558 | 1615 | 57  |
| 46 | 1558 | 1633 | 75  |
| 47 | 1558 | 1650 | 92  |
| 48 | 1607 | 1665 | 58  |
| 49 | 1607 | 1686 | 79  |
| 50 | 1628 | 1703 | 75  |
| 51 | 1628 | 1718 | 90  |
| 52 | 1738 | 1734 | 4   |
| 53 | 1738 | 1747 | 9   |
| 54 | 1738 | 1756 | 18  |
| 55 | 1790 | 1770 | 20  |
| 56 | 1790 | 1785 | 5   |
| 57 | 1804 | 1799 | 5   |
| 58 | 1804 | 1809 | 5   |
| 59 | 1823 | 1819 | 4   |
| 60 | 1823 | 1825 | 2   |

Table 5: Data points for daily confirmed cases of Ford county along with values obtained from our simulation and their absolute difference.

#### 4. Supplementary Tables for New York City, USA:

| Name                     | Value |
|--------------------------|-------|
| min_age                  | 1     |
| max_age                  | 81    |
| min_name_length          | 3     |
| max_name_length          | 7     |
| min_family_size          | 1     |
| max_family_size          | 6     |
| n_workgroup              | 600   |
| n_transport              | 2500  |
| transport_seat_limit     | 60    |
| n_events                 | 100   |
| n_persons                | 10000 |
| n_infected_init          | 1     |
| awareness_start          | 7     |
| quarantine_start         | 27    |
| quarantined_person_ratio | 0.5   |

Table 6: Part 1 of location-specific data for New York city including total population, initial cases, average family size, life expectancy, lock-down declaration etc. The values have been scaled to accommodate for a population of 10000 from 8.3 million.

| Name    | Minimum age | Maximum age | Percentage | Total number (Per 10000 population) |
|---------|-------------|-------------|------------|-------------------------------------|
| Student | 4           | 25          | 0.22       | 2200                                |

|            |    |    |       |      |
|------------|----|----|-------|------|
| Service    | 18 | 62 | 0.741 | 7410 |
| Doctor     | 25 | 70 | 0.019 | 190  |
| Unemployed | 10 | 81 | 0.02  | 200  |

Table 7: Part 2 of location-specific data for New York city including percentage of the total population belonging to different professions.

| Name                       | Value |
|----------------------------|-------|
| action_occurring_threshold | 0.55  |
| action_affecting_threshold | 0.55  |
| action_infect_threshold    | 0.45  |
| infection_threshold        | 0.55  |

Table 8: Values of different thresholds for New York city.

| Task           | Minimum start time | Maximum start time | Minimum duration | Maximum duration | Profession | Minimum probability | Maximum probability |
|----------------|--------------------|--------------------|------------------|------------------|------------|---------------------|---------------------|
| Stay Home      | 0                  | 0                  | 7                | 8                | Service    | 1                   | 1                   |
| Stay Home      | 0                  | 0                  | 6                | 7                | Driver     | 1                   | 1                   |
| Stay Home      | 0                  | 0                  | 7                | 8                | Doctor     | 1                   | 1                   |
| Go to Work     | 7                  | 8                  | 1                | 2                | Service    | 0.4                 | 1                   |
| Go to Work     | 6                  | 7                  | 1                | 1                | Driver     | 0.4                 | 1                   |
| Go to Work     | 7                  | 8                  | 1                | 2                | Doctor     | 0.8                 | 1                   |
| Work           | 8                  | 10                 | 8                | 9                | Service    | 0.4                 | 1                   |
| Treat Patients | 7                  | 8                  | 8                | 12               | Driver     | 0.4                 | 1                   |
| Treat Patients | 8                  | 9                  | 8                | 10               | Doctor     | 0.8                 | 1                   |
| Returns Home   | 16                 | 19                 | 1                | 2                | Service    | 0.4                 | 1                   |
| Returns Home   | 15                 | 20                 | 1                | 1                | Driver     | 0.4                 | 1                   |
| Returns Home   | 16                 | 19                 | 1                | 2                | Doctor     | 0.8                 | 1                   |



|               |    |    |    |    |                      |      |      |
|---------------|----|----|----|----|----------------------|------|------|
| Stay Home     | 17 | 21 | 10 | 10 | Service              | 1    | 1    |
| Stay Home     | 16 | 21 | 10 | 10 | Driver               | 1    | 1    |
| Stay Home     | 17 | 21 | 10 | 10 | Doctor               | 1    | 1    |
| Attend Event  | 12 | 14 | 2  | 4  | Service              | 0.3  | 0.9  |
| Attend Event  | 12 | 14 | 2  | 4  | Driver               | 0.3  | 0.6  |
| Attend Event  | 12 | 14 | 2  | 3  | Doctor               | 0.3  | 0.7  |
| Stay Home     | 0  | 0  | 12 | 13 | Unemploy<br>ed       | 1    | 1    |
| Stay Hospital | 0  | 0  | 24 | 24 | Hospitaliz<br>ed     | 1    | 1    |
| Stay Home     | 0  | 0  | 7  | 8  | Student              | 1    | 1    |
| Go to Work    | 7  | 8  | 1  | 1  | Student              | 0.4  | 1    |
| Work          | 8  | 9  | 6  | 7  | Student              | 0.4  | 1    |
| Returns Home  | 14 | 16 | 1  | 1  | Student              | 0.4  | 1    |
| Stay Home     | 15 | 17 | 10 | 10 | Student              | 1    | 1    |
| Attend Event  | 12 | 14 | 2  | 4  | Student              | 0.4  | 0.9  |
| Go to Work    | 12 | 13 | 1  | 1  | Unemploy<br>ed       | 0.3  | 0.55 |
| Attend Event  | 13 | 14 | 2  | 4  | Unemploy<br>ed       | 0.35 | 0.6  |
| Returns Home  | 15 | 18 | 1  | 1  | Unemploy<br>ed       | 0.3  | 0.55 |
| Stay Home     | 16 | 17 | 10 | 10 | Unemploy<br>ed       | 1    | 1    |
| Stay Home     | 0  | 0  | 24 | 24 | No Outing<br>Allowed | 1    | 1    |

Table 9: The lower and upper bounds of duration, probability of occurrence, starting and ending times for different tasks performed by an agent in New York city.

## 5. Supplementary Tables for Physiological Data

| Action            | Min time gap | Max time gap | Min prob affect | Max prob affect | task           | Min prob | Max prob | Min effect others | Max effect others | Min effect self | Max effect self |
|-------------------|--------------|--------------|-----------------|-----------------|----------------|----------|----------|-------------------|-------------------|-----------------|-----------------|
| Sneeze            | 40           | 50           | 0.1             | 0.7             | Work           | 0.1      | 0.605    | 0.1               | 0.705             | 0               | 0               |
| Contaminate Thing | 50           | 55           | 0.1             | 0.7             | Work           | 0.1      | 0.605    | 0.1               | 0.705             | 0               | 0               |
| Physical Contact  | 20           | 30           | 0.1             | 0.7             | Work           | 0.1      | 0.605    | 0.1               | 0.705             | 0               | 0               |
| Sneeze            | 40           | 50           | 0.1             | 0.7             | Attend Event   | 0.1      | 0.65     | 0.1               | 0.8               | 0               | 0               |
| Contaminate Thing | 20           | 30           | 0.1             | 0.8             | Attend Event   | 0.1      | 0.8      | 0.1               | 0.8               | 0               | 0               |
| Physical Contact  | 20           | 30           | 0.2             | 0.8             | Attend Event   | 0.2      | 0.8      | 0.3               | 0.8               | 0               | 0               |
| Sneeze            | 40           | 50           | 0.1             | 0.7             | Go to Work     | 0.1      | 0.7      | 0.1               | 0.705             | 0               | 0               |
| Contaminate Thing | 20           | 30           | 0.1             | 0.7             | Go to Work     | 0.1      | 0.7      | 0.1               | 0.705             | 0               | 0               |
| Physical Contact  | 20           | 30           | 0.1             | 0.7             | Go to Work     | 0.1      | 0.7      | 0.1               | 0.705             | 0               | 0               |
| Sneeze            | 40           | 50           | 0.1             | 0.7             | Returns Home   | 0.1      | 0.7      | 0.1               | 0.705             | 0               | 0               |
| Contaminate Thing | 20           | 30           | 0.1             | 0.7             | Returns Home   | 0.1      | 0.7      | 0.1               | 0.705             | 0               | 0               |
| Physical Contact  | 20           | 30           | 0.1             | 0.7             | Returns Home   | 0.1      | 0.7      | 0.1               | 0.705             | 0               | 0               |
| Sneeze            | 40           | 50           | 0.1             | 0.7             | Stay Hospital  | 0.1      | 0.7      | 0.1               | 0.705             | 0               | 0               |
| Contaminate Thing | 50           | 55           | 0.1             | 0.8             | Stay Hospital  | 0.1      | 0.8      | 0.1               | 0.705             | 0               | 0               |
| Physical Contact  | 20           | 30           | 0.1             | 0.8             | Stay Hospital  | 0.1      | 0.8      | 0.1               | 0.705             | 0               | 0               |
| Physical Contact  | 20           | 30           | 0.1             | 0.8             | Treat Patients | 0.1      | 0.8      | 0.1               | 0.705             | 0               | 0               |
| Sleep             | 1000         | 1000         | 0               | 0               | Stay Home      | 1        | 1        | 0                 | 0                 | 0               | 0               |
| Wash Hands        | 30           | 40           | 0.5             | 1               | Work           | 0.1      | 0.7      | 0                 | 0                 | -0.75           | -0.1            |
| Wash Hands        | 30           | 40           | 0.5             | 1               | Stay Home      | 0.2      | 0.7      | 0                 | 0                 | -0.75           | -0.1            |
| Wash Hands        | 30           | 40           | 0.4             | 1               | Attend Event   | 0.1      | 0.7      | 0                 | 0                 | -0.75           | -0.1            |
| Wash Hands        | 20           | 40           | 0.4             | 1               | Treat Patients | 0.2      | 0.7      | 0                 | 0                 | -0.75           | -0.1            |
| Contaminate Thing | 50           | 55           | 0.1             | 0.7             | Treat Patients | 0.1      | 0.605    | 0.1               | 0.705             | 0               | 0               |
| Sneeze            | 40           | 50           | 0.1             | 0.7             | Treat Patients | 0.1      | 0.605    | 0.1               | 0.705             | 0               | 0               |

Table 10: Lower and upper bounds of time interval between actions, probability of occurrence, effects on oneself and others etc. Here, min, max and prob refer to minimum, maximum and probability respectively.

## 6. Scaled down version of New York City

For conducting our experiments in case of New York city, we have chosen to run the simulations for 10,000 people. This involves scaling the location-specific input parameters for the smaller population. Table 7 shows that the proportion of people engaged in different professions are supplied as percentages to the model. However, some parameters are adjusted for the population of size = 10000. This can be understood from Table 11.

| Name of Parameter           | Total population of NYC | Scaled down version of NYC |
|-----------------------------|-------------------------|----------------------------|
| Population size             | 8,399,000               | 10,000                     |
| Number of events (approx)   | 84,000                  | 100                        |
| Number of groups (approx)   | 504,000                 | 600                        |
| Number of vehicles (approx) | 2,000,000               | 2,500                      |

Table 11: Scaling of parameters for New York city for a population of 10000.

Data pertaining to Table 11 has been collected from various sources.<sup>4,5,6,7</sup> Moreover, we have considered each working group to contain 10-12 people approximately. In case of the gatherings, we have considered approximately 100 people or less to be present.

To compare the daily values of effective reproduction number ( $R_t$ ) of our scaled down ABM model with an SIR model, we calculate the  $R_t$  values for each day using the following formula:

$$R_t(x) = \frac{\sum_{i \in I(x)} d_i^{out}}{|I(x)|}$$

Here,  $R_t(x)$  denotes the  $R_t$  value on day  $x$ .  $I(x)$  is the set of persons infected on day  $x$ .  $d_i^{out}$  is the number of secondary infections caused by person  $i$ . Venkatramanan *et al.* provided a formula for calculating the weekly values of  $R_t$  that has been adopted for determining daily values in the above equation.<sup>8</sup> To remove noise generated by randomness of each day, the  $R_t$  curve was smoothened.

### Methodology of SIR model:

We have used the well known SIR model,<sup>9</sup> which divides the total population into three different compartments, namely *Susceptible*, *Infectious* and *Removed*. We have assumed the total population to be *Susceptible* initially. The rate of change from *Susceptible* to *Infectious* is defined as *Transmission Rate* ( $\beta$ ). On the other hand, the rate of change from *Infectious* to *Removed* is termed as *Removal Rate* ( $\gamma$ ). *Removal Rate* is assumed to be constant over the period of time, while the *Transmission Rate* is assumed to be time variant. We performed a grid search among the plausible values of *Removal Rate* and the value with maximum likelihood is used as *Removal Rate* henceforth. On the other hand, based on the work of Kurchaski *et al.*,<sup>10</sup> we have modeled transmission (i.e., *Transmission Rate*) as a stochastic random walk process. We have used Sequential Monte Carlo simulation (i.e., Particle Filter),<sup>11,12</sup> in order

to find *Transmission Rate* with time, and consequently  $R_t$  as well. Sequential Monte Carlo simulation is run 100 times with bootstrap fits to deduce various confidence intervals of  $R_t$ . Our model is fitted with the number of daily confirmed cases. While fitting the model, we have tried to maximize negative log likelihood.

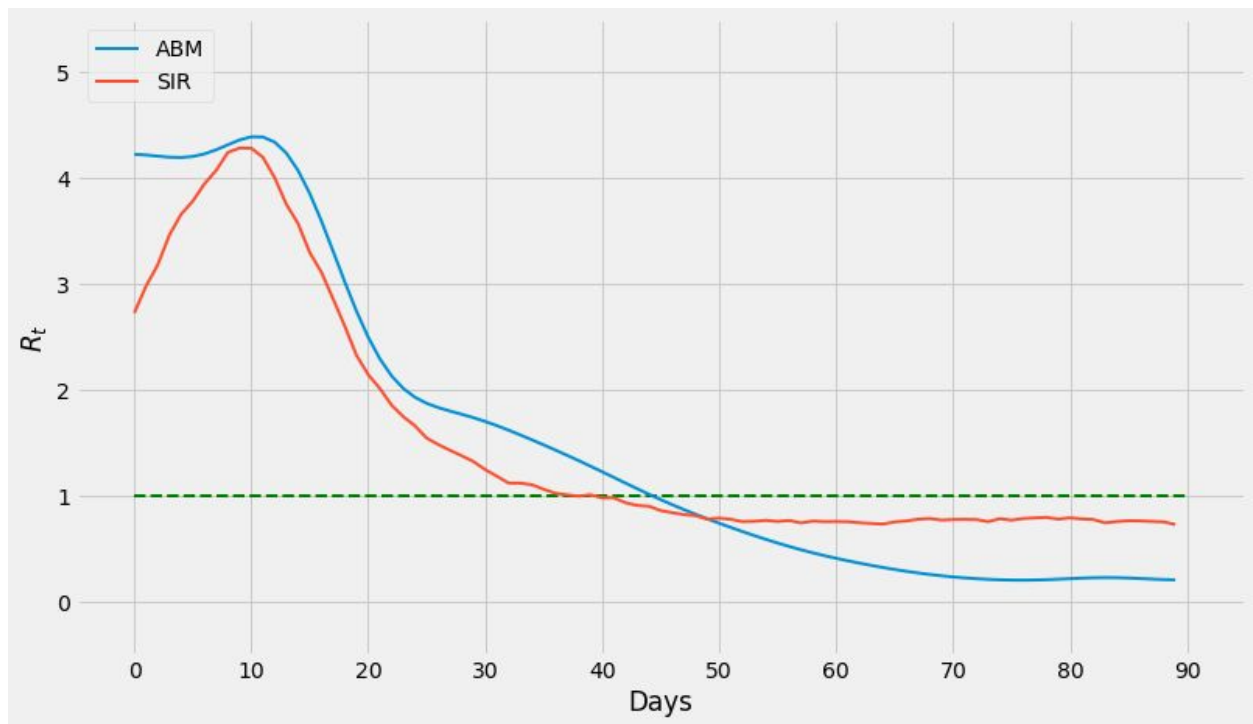

Figure 1:  $R_t$  curves by ABM model with scaled down population (blue) and SIR model with full population (red) of NYC. The blue curve appears to be similar to the red curve with an RMSE value of 0.4626, although converging to zero sooner than the red curve because of the smaller size of population.

Figure 1 shows that the  $R_t$  curves obtained in the ABM and SIR models are consistent, thus supporting the reasoning behind choosing to scale down the parameters of New York city.

## 7. References

- 1 What is herd immunity; June 18, 2020. <https://www.jhsph.edu/covid-19/articles/achieving-herd-immunity-with-covid19.html>
- 2 Bulchandani VB, Shivam S, Moudgalya S, Sondhi SL. Digital herd immunity and COVID-19. *arXiv preprint arXiv:2004.07237*. 2020 Apr 15.
- 3 Digital Contact Tracing; June 18, 2020. [https://en.wikipedia.org/wiki/Digital\\_contact\\_tracing](https://en.wikipedia.org/wiki/Digital_contact_tracing)
- 4 New York City population; June 18, 2020. [https://en.wikipedia.org/wiki/New\\_York\\_City](https://en.wikipedia.org/wiki/New_York_City)
- 5 New York City cars; June 18, 2020. <https://nyc.streetsblog.org/2018/10/03/car-ownership-continues-to-rise-under-mayor-de-blasio/#:~:text=Over%20there%20were%201%2C923%2C041%20cars,over%20the%20four%2Dyear%20period.>
- 6 New York City buses; June 18, 2020. [https://www.ny.com/transportation/buses/#:~:text=City%20Bus%20System-,The%20New%20York%20City%20Bus%20System,West\)%20routes%20and%20outlying%20areas.](https://www.ny.com/transportation/buses/#:~:text=City%20Bus%20System-,The%20New%20York%20City%20Bus%20System,West)%20routes%20and%20outlying%20areas.)
- 7 New York City subways; June 18, 2020. [https://en.wikipedia.org/wiki/New\\_York\\_City\\_Subway](https://en.wikipedia.org/wiki/New_York_City_Subway)

- 8 Venkatramanan S, Lewis B, Chen J, Higdon D, Vullikanti A, Marathe M. Using data-driven agent-based models for forecasting emerging infectious diseases. *Epidemics*. 2018 Mar 1;**22**:43-9.
- 9 Kermack WO, McKendrick AG. A contribution to the mathematical theory of epidemics. *Proceedings of the royal society of london. Series A, Containing papers of a mathematical and physical character*. 1927 Aug 1;**115**(772):700-21.
- 10 Kucharski AJ, Russell TW, Diamond C, Liu Y, Edmunds J, Funk S, Eggo RM, Sun F, Jit M, Munday JD, Davies N. Early dynamics of transmission and control of COVID-19: a mathematical modelling study. *The lancet infectious diseases*. 2020 Mar 11.
- 11 Liu JS, Chen R. Sequential Monte Carlo methods for dynamic systems. *Journal of the American statistical association*. 1998 Sep 1;**93**(443):1032-44.
- 12 Del Moral P. Nonlinear filtering: Interacting particle resolution. *Comptes Rendus de l'Académie des Sciences-Series I-Mathematics*. 1997 Sep 1;**325**(6):653-8.
